# Supplementary material for: Impact of Nutrient Intake on Body Composition in Very Low-Birth Weight Infants Following Early Progressive Enteral Feeding
Source: MDPI journal article supplement (doi:10.3390/nu16101462), 2024-05-13
Supplement: s1 [file s1]

**Table S1.** Main differences in body composition estimates between two groups, given as median and interquartile ranges and means and standard deviations.

| Characteristics                                 | Extremely Preterm<br><i>n</i> =32 | Very Preterm<br><i>n</i> =54 | <i>p</i>         |
|-------------------------------------------------|-----------------------------------|------------------------------|------------------|
| PMA on the day of DXA scan, weeks               | 36.2 (35.0–37.7)                  | 35.4 (34.5–36.3)             | <b>0.036</b>     |
| Chronological age on the day of DXA scan, weeks | 10.2 (8.2–12.3)                   | 6.2 (4.7–7.0)                | <b>&lt;0.001</b> |
| Weight on the DXA day, g                        | 2558 (± 354)                      | 2284 (± 358)                 | <b>&lt;0.001</b> |
| Length on the DXA day, cm                       | 46.0 (± 1.9)                      | 45.3 (± 2.0)                 | 0.074            |
| DXA estimated total mass, g                     | 2786 (± 374)                      | 2512 (± 371)                 | <b>0.001</b>     |
| DXA estimated lean mass, g                      | 2086 (± 246)                      | 2012 (± 249)                 | 0.188            |
| DXA estimated fat mass, g                       | 700 (± 212)                       | 500 (± 209)                  | <b>&lt;0.001</b> |
| DXA estimated fat mass percentage, %            | 24.8 (± 5.4)                      | 19.4 (± 6.4)                 | <b>&lt;0.001</b> |
| Sum of SFT on the day of DXA scan, mm           | 17.8 (±2.6)                       | 15.9 (±2.9)                  | <b>0.004</b>     |
| Sum of SFT at 12 months of CA, mm               | 26.9(±5.5)                        | 26.3(±4.6)                   | 0.661            |

PMA – postmenstrual age, CA – corrected age, DXA – dual X-ray absorptiometry, SFT – skinfold thickness.
